# Supplementary material for: Elimination of subtelomeric repeat sequences exerts little effect on telomere essential functions in Saccharomyces cerevisiae
Source: bioRxiv preprint, doi:10.1101/2023.08.29.555450, version 3 (2024-02-22)
Supplement: Supplementary file 5 [file 555450_file06.docx]

Supplementary file 5. Quantitation of each survivor type in SY12 subtelomeric strains

| strain | I survivor | II survivor | Type X survivor | Uncharacterized survivor | Circular survivor | Total |
| --- | --- | --- | --- | --- | --- | --- |
| SY12 *tlc1*Δ | 8 | 1 | 12 | 19 | 10 | 50 |
| SY12YΔ *tlc1*Δ | 0 | 2 | 0 | 22 | 26 | 50 |
| SY12XYΔ *tlc1*Δ | 0 | 4 | 0 | 22 | 24 | 50 |
| SY12XYΔ+Y *tlc1*Δ | 0 | 7 | 0 | 21 | 22 | 50 |
| SY12XYΔ *tlc1*Δ *rad51*Δ | 0 | 8 | 0 | 8 | 9 | 25 |
